# Supplementary material for: Nanoshaping field emitters from glassy carbon sheets: a new functionality induced by H-plasma etching
Source: Royal Society of Chemistry journal article supplement (doi:10.1039/c6cp03606f), 2016-01-01
Supplement: c6cp03606f1.pdf [file c6cp03606f1.pdf]

## Supplementary Material

### Nanoshaping field emitters from glassy carbon sheets: a new functionality induced by H-plasma etching

S. Gay<sup>a,b</sup>, S. Orlanducci<sup>a</sup>, D. Passeri<sup>c</sup>, M. Rossi<sup>c,d</sup> and M. L. Terranova<sup>a</sup>

<sup>a</sup> Department of Chemical Sciences and Technologies, University of Rome Tor Vergata, Via della Ricerca Scientifica, 00133 Rome, Italy

<sup>b</sup> HORIBA Italia S.r.l., Viale Luca Gaurico 209/211, Rome, Italy

<sup>c</sup> Department of Basic and Applied Sciences for Engineering, SAPIENZA University of Rome, Via A. Scarpa 16, 00161 Rome, Italy

<sup>d</sup> Research Center for Nanotechnology applied to Engineering of SAPIENZA University of Rome (CNIS), Piazzale A. Moro 5, 00185 Rome, Italy

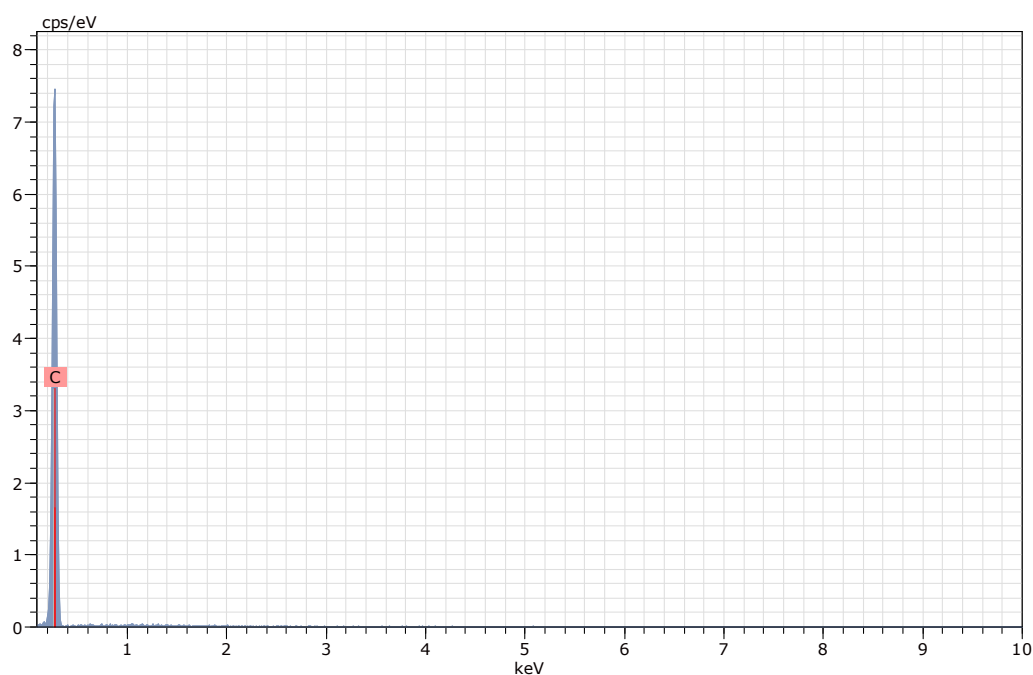

**Figure S1.** Example of EDX spectrum obtained on one of the sample (sample LB).

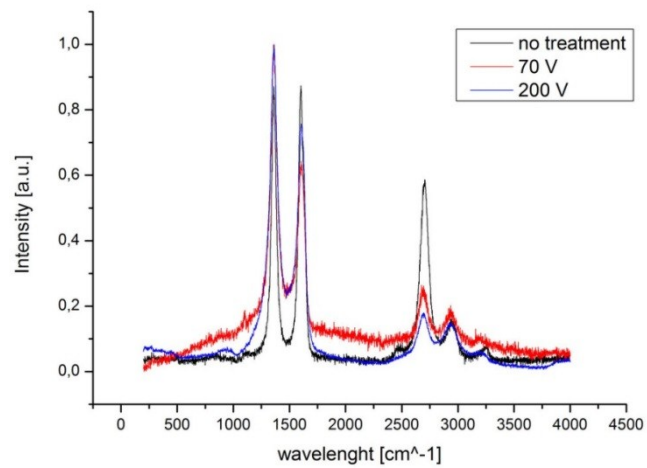

**Figure S2.** Raman spectra of pristine (black), LB (red) and HB (blue) samples (laser source: 532 nm)

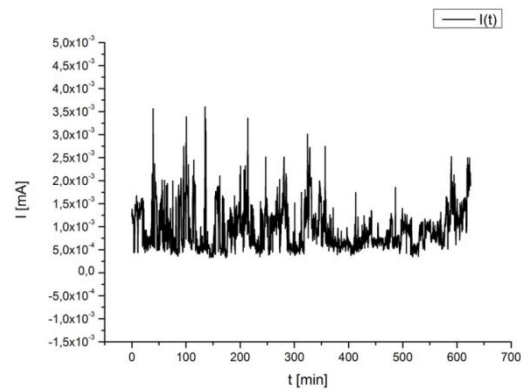

**Figure S3.** FE current from HB sample obtained at applied potential  $E = 1,5 \text{ keV}$
